# Supplementary material for: Dual dielectric-responsive hybrid materials with fluorescent properties
Source: Royal Society of Chemistry journal article supplement (doi:10.1039/d2nj04939b), 2022-12-20
Supplement: d2nj04939b1.pdf [file d2nj04939b1.pdf]

**Electronic Supplementary Material (ESI) for New Journal of Chemistry**  
**Dual Dielectric-responsive Hybrid Materials Accompanying With Fluorescent Properties**

**Ran Xu,<sup>a</sup> Meng-Meng Lun,<sup>a</sup> Tie Zhang,<sup>a</sup> Jie Li,<sup>a</sup> Ke Zou,<sup>a</sup> Yi Zhang,<sup>\*a</sup> Da-Wei Fu<sup>\*a</sup> and Qiang Guo<sup>\*b</sup>**

<sup>a</sup> Ordered Matter Science Research Center, Jiangsu Key Laboratory for Science and Applications of Molecular Ferroelectrics, Southeast University, Nanjing 211189, People's Republic of China.

<sup>b</sup> Institute for Science and Applications of Molecular Ferroelectrics, Key Laboratory of the Ministry of Education for Advanced Catalysis Materials, Zhejiang Normal University, Jinhua, 321004, People's Republic of China.

# Characterizations and Methods

## Powder X-ray Diffraction

The powder X-ray diffraction experiment (PXRD) measurement was performed on a Rigaku Smartlab X-ray diffractometer. The diffraction pattern is recorded in the  $2\theta$  range of  $5\text{--}50^\circ$  with a step size of  $0.02^\circ$ . The powder X-ray diffraction measurement results are in good agreement with the crystal structure simulation results at room temperature, confirming the purity of the compound **1** and **2**.

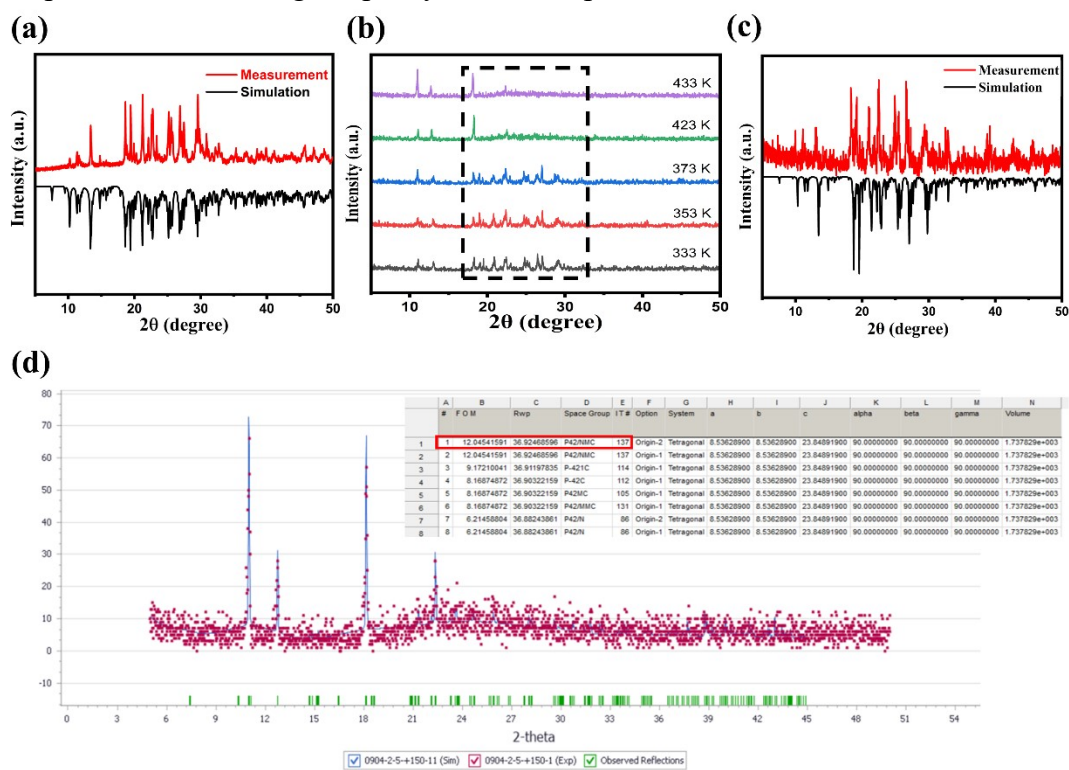

**Fig. S1** (a)XRD of compound **1** at room temperature. (b)PXRD patterns of variable temperature for compound **1** in the temperature range from 333 K to 433 K. (c) XRD of compound **2** at room temperature. (d) The simulation result of the PXRD data of compound **1** at 423 K.

## Thermogravimetric Tests

Thermogravimetric tests on NETZSCH TG 209F3 at a heating rate of 20 K min<sup>-1</sup> over a temperature range of 310 K to 1073 K.

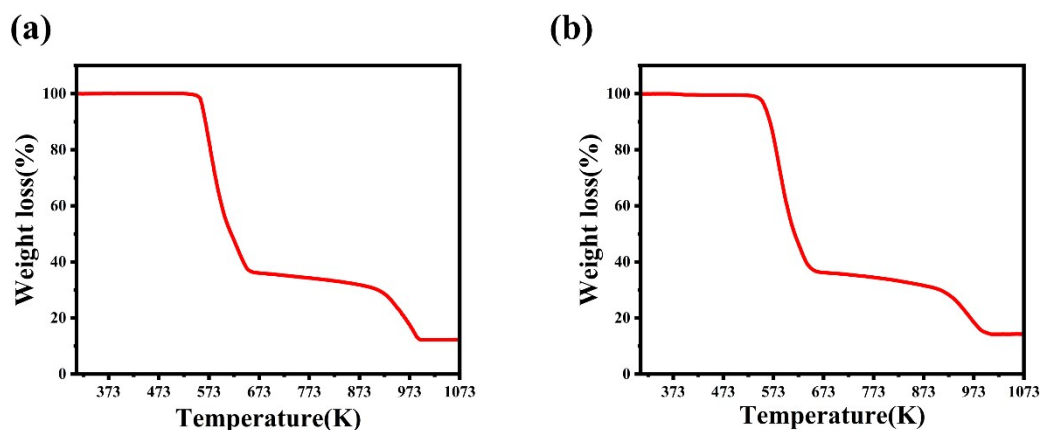

Fig. S2 TGA curves of compound 1 and 2 in the temperature range of 310 K-1073 K.

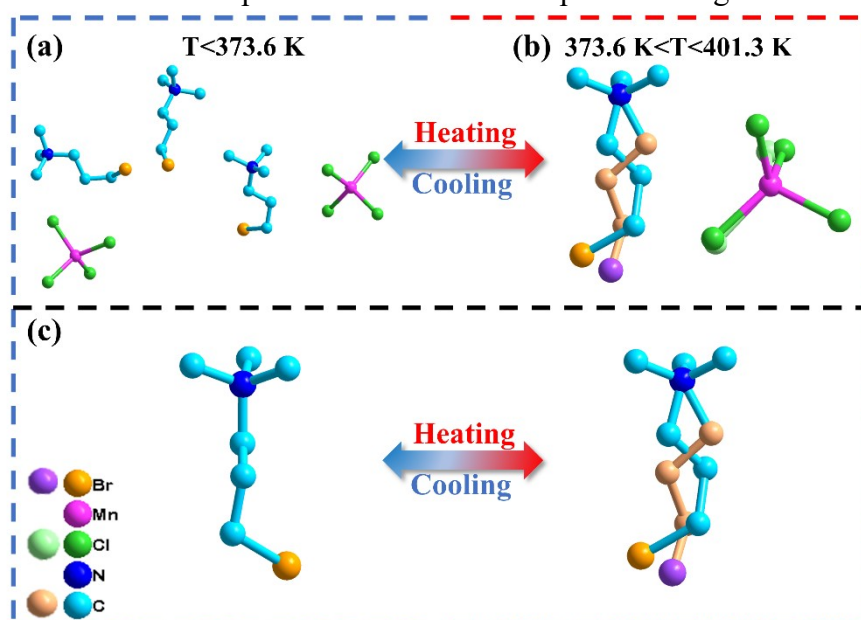

Fig. S3 The asymmetric units of compound 2 in (a) LTP ( $T < 373.6$  K) and (b) ITP ( $373.6 \text{ K} < T < 401.3$  K). (c) Ordered and disordered movements of BTA cation.

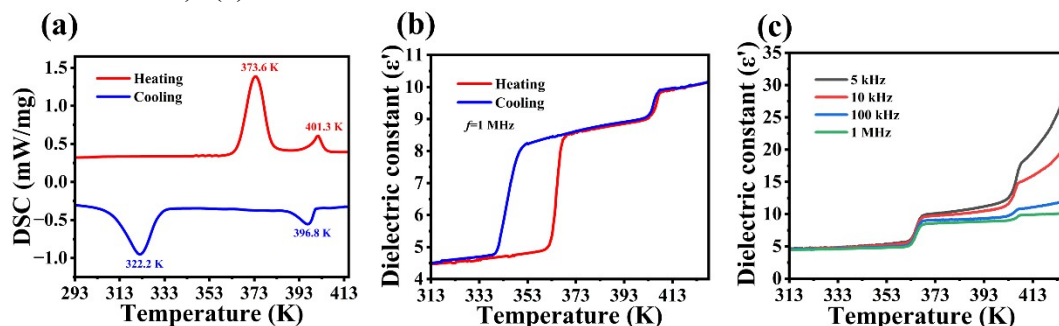

Fig. S4 (a) DSC curve of 2 during the heating and cooling processes. (b) Dielectric measurement of 2 at 1 MHz. (c) The dielectric measurement of 2 at different frequencies during the heating process.

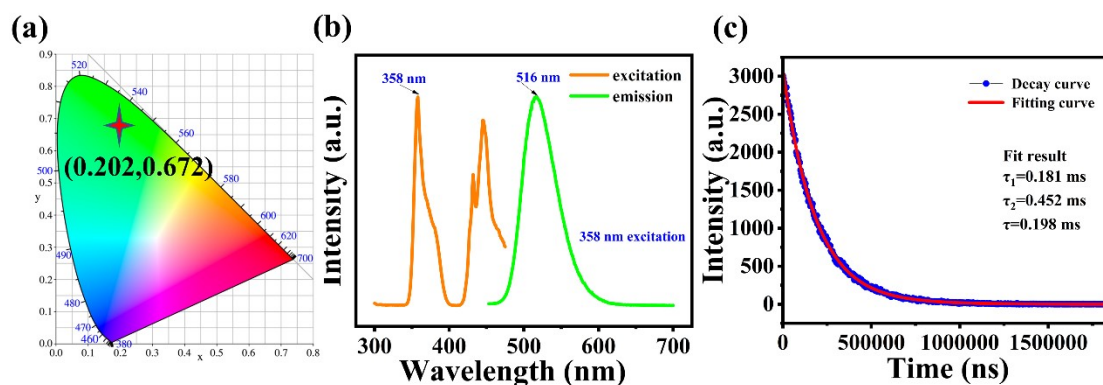

**Fig. S5** (a) CIE coordinates of **2**. (b) Excitation (orange line) and emission (green line for  $\lambda_{\text{ex}} = 358$  nm) spectra of **2**. (c) PL decay curve of **2**.

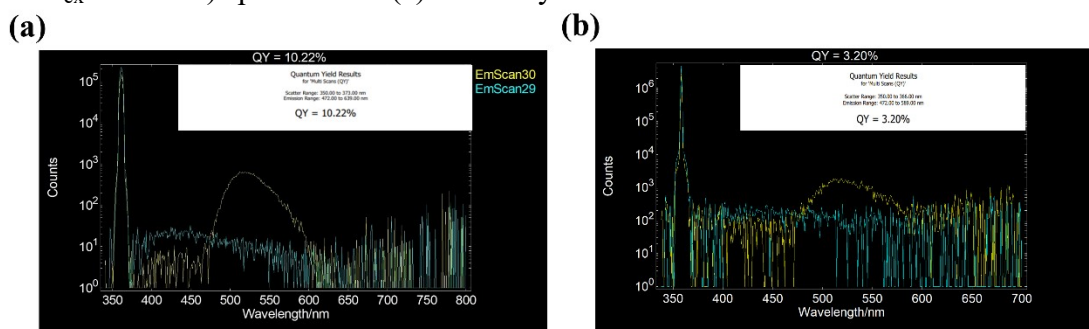

**Fig.S6** Photoluminescence quantum yield measurement curves and results of compound **1** and **2**.

**Table S1** Crystal data and structure refinement for  $[(\text{BTA})_2\text{MnCl}_{2.4}\text{Br}_{1.6}]$  at 282 K and 375 K.

|                                                    | 282 K                                                                              | 375 K                                                                              |
|----------------------------------------------------|------------------------------------------------------------------------------------|------------------------------------------------------------------------------------|
| $[(\text{BTA})_2\text{MnCl}_{2.4}\text{Br}_{1.6}]$ |                                                                                    |                                                                                    |
| Empirical formula                                  | $\text{C}_{36}\text{H}_{90}\text{Br}_{10.76}\text{Cl}_{7.24}\text{Mn}_3\text{N}_6$ | $\text{C}_{36}\text{H}_{90}\text{Br}_{10.94}\text{Cl}_{7.06}\text{Mn}_3\text{N}_6$ |
| Formula weight                                     | 1888.44                                                                            | 1896.45                                                                            |
| Temperature/K                                      | 282(3)                                                                             | 374.98(10)                                                                         |
| Crystal system                                     | monoclinic                                                                         | monoclinic                                                                         |
| Space group                                        | $P2/c$                                                                             | $P2/c$                                                                             |
| $a/\text{\AA}$                                     | 23.5235(8)                                                                         | 23.6709(12)                                                                        |
| $b/\text{\AA}$                                     | 9.3471(3)                                                                          | 9.4002(4)                                                                          |
| $c/\text{\AA}$                                     | 15.7733(5)                                                                         | 15.9372(7)                                                                         |

|                           |           |           |
|---------------------------|-----------|-----------|
| $\alpha/^\circ$           | 90        | 90        |
| $\beta/^\circ$            | 91.648(3) | 91.605(4) |
| $\gamma/^\circ$           | 90        | 90        |
| Volume/ $\text{\AA}^3$    | 3466.7(2) | 3544.8(3) |
| Z                         | 2         | 2         |
| F(000)                    | 1845.0    | 1852.0    |
| GOF                       | 1.028     | 1.025     |
| $R_1[I \geq 2\sigma(I)]$  | 0.0410    | 0.0562    |
| $wR_2[I \geq 2\sigma(I)]$ | 0.0979    | 0.1791    |

**Table S2** Crystal data and structure refinement for [(BTA)<sub>2</sub>MnCl<sub>4</sub>] at 284 K and 375 K.

| [(BTA) <sub>2</sub> MnCl <sub>4</sub> ] | 284 K                                                                            | 375 K                                                                            |
|-----------------------------------------|----------------------------------------------------------------------------------|----------------------------------------------------------------------------------|
| Empirical formula                       | C <sub>12</sub> H <sub>30</sub> Br <sub>2</sub> Cl <sub>4</sub> MnN <sub>2</sub> | C <sub>12</sub> H <sub>30</sub> Br <sub>2</sub> Cl <sub>4</sub> MnN <sub>2</sub> |
| Formula weight                          | 558.94                                                                           | 558.94                                                                           |
| Temperature/K                           | 284.15                                                                           | 374.99(10)                                                                       |
| Crystal system                          | monoclinic                                                                       | monoclinic                                                                       |
| Space group                             | <i>P2/c</i>                                                                      | <i>C2/c</i>                                                                      |
| <i>a</i> / $\text{\AA}$                 | 23.3275(8)                                                                       | 16.385(3)                                                                        |
| <i>b</i> / $\text{\AA}$                 | 9.2150(3)                                                                        | 9.5496(11)                                                                       |
| <i>c</i> / $\text{\AA}$                 | 15.6388(5)                                                                       | 15.941(2)                                                                        |
| $\alpha/^\circ$                         | 90                                                                               | 90                                                                               |
| $\beta/^\circ$                          | 91.636(3)                                                                        | 111.036(19)                                                                      |
| $\gamma/^\circ$                         | 90                                                                               | 90                                                                               |

|                            |             |           |
|----------------------------|-------------|-----------|
| Volume/Å <sup>3</sup>      | 3360.39(19) | 2328.1(7) |
| Z                          | 6           | 4         |
| F(000)                     | 1674.0      | 1116.0    |
| GOF                        | 1.043       | 1.217     |
| R <sub>1</sub> [I>2σ (I)]  | 0.0561      | 0.1433    |
| wR <sub>2</sub> [I>2σ (I)] | 0.1012      | 0.2908    |

**Table S3** The main bond length (Å) of the crystal structure of [(BTA)<sub>2</sub>MnCl<sub>2.4</sub>Br<sub>1.6</sub>] at 282 K

| Bond lengths [Å]     |           |         |          |
|----------------------|-----------|---------|----------|
| Br9-C18              | 1.938(4)  | N3-C15  | 1.489(4) |
| Br8-C12              | 1.941(4)  | N3-C13  | 1.486(5) |
| Mn1-Cl2              | 2.4320(8) | N3-C14  | 1.499(5) |
| Mn1-Cl2 <sup>1</sup> | 2.4321(8) | N1-C4   | 1.515(5) |
| Mn1-Cl1 <sup>1</sup> | 2.4006(8) | N1-C3   | 1.485(5) |
| Mn1-Cl1              | 2.4006(8) | N1-C2   | 1.495(5) |
| Mn1-Br2              | 2.4320(8) | N1-C1   | 1.494(5) |
| Mn1-Br1              | 2.4006(8) | N2-C10  | 1.504(5) |
| Mn2-Cl4              | 2.4265(8) | N2-C9   | 1.491(5) |
| Mn2-Cl5              | 2.4649(8) | N2-C7   | 1.499(5) |
| Mn2-Cl3              | 2.4284(8) | N2-C8   | 1.491(5) |
| Mn2-Cl6              | 2.4261(8) | C16-C17 | 1.493(5) |
| Mn2-Br3              | 2.4284(8) | C11-C10 | 1.500(5) |
| Mn2-Br4              | 2.4265(8) | C11-C12 | 1.495(5) |
| Mn2-Br5              | 2.4649(8) | C4-C5   | 1.515(6) |
| Mn2-Br6              | 2.4261(8) | C17-C18 | 1.512(6) |
| Br7-C6               | 1.921(5)  | C5-C6   | 1.518(7) |
| N3-C16               | 1.528(5)  |         |          |

<sup>1</sup>1-X, +Y, 1/2-Z

**Table S4** The main bond angles (°) of the crystal structure of [(BTA)<sub>2</sub>MnCl<sub>2.4</sub>Br<sub>1.6</sub>] at 282 K

| Bond angles [°]                        |           |             |          |
|----------------------------------------|-----------|-------------|----------|
| Cl2-Mn1-Cl2 <sup>1</sup>               | 106.91(4) | C13-N3-C14  | 108.4(3) |
| Cl1 <sup>1</sup> -Mn1-Cl2 <sup>1</sup> | 102.95(3) | C14-N3-C16  | 106.6(3) |
| Cl1-Mn1-Cl2                            | 102.95(3) | C3-N1-C4    | 111.7(3) |
| Cl1-Mn1-Cl2 <sup>1</sup>               | 109.93(3) | C3-N1-C2    | 109.8(3) |
| Cl1 <sup>1</sup> -Mn1-Cl2              | 109.93(3) | C3-N1-C1    | 108.4(3) |
| Cl1 <sup>1</sup> -Mn1-Cl1              | 123.35(5) | C2-N1-C4    | 110.8(3) |
| Br1-Mn1-Br2                            | 102.95(3) | C1-N1-C4    | 107.1(3) |
| Cl4-Mn2-Cl5                            | 106.12(3) | C1-N1-C2    | 109.1(3) |
| Cl4-Mn2-Cl3                            | 115.58(3) | C9-N2-C10   | 111.1(3) |
| Cl3-Mn2-Cl5                            | 107.38(3) | C9-N2-C7    | 107.9(3) |
| Cl6-Mn2-Cl4                            | 110.31(3) | C7-N2-C10   | 107.5(3) |
| Cl6-Mn2-Cl5                            | 106.59(3) | C8-N2-C10   | 110.8(3) |
| Cl6-Mn2-Cl3                            | 110.34(3) | C8-N2-C9    | 110.4(4) |
| Br3-Mn2-Br5                            | 107.38(3) | C8-N2-C7    | 109.0(4) |
| Br4-Mn2-Br3                            | 115.58(3) | C17-C16-N3  | 114.5(3) |
| Br4-Mn2-Br5                            | 106.12(3) | C12-C11-C10 | 108.5(3) |
| Br6-Mn2-Br3                            | 110.34(3) | C11-C10-N2  | 115.9(3) |
| Br6-Mn2-Br4                            | 110.31(3) | C5-C4-N1    | 114.1(3) |
| Br6-Mn2-Br5                            | 106.59(3) | C11-C12-Br8 | 112.5(3) |
| C15-N3-C16                             | 110.9(3)  | C16-C17-C18 | 112.0(3) |
| C15-N3-C14                             | 108.9(3)  | C17-C18-Br9 | 113.1(3) |
| C13-N3-C16                             | 112.1(3)  | C4-C5-C6    | 112.1(4) |
| C13-N3-C15                             | 109.9(3)  | C5-C6-Br7   | 112.5(3) |

<sup>1</sup>1-X, +Y, 1/2-Z**Table S5** The main bond length (Å) of the crystal structure of [(BTA)<sub>2</sub>MnCl<sub>2.4</sub>Br<sub>1.6</sub>] at 375 K

| Bond lengths [Å] |            |       |          |
|------------------|------------|-------|----------|
| Mn1-Cl2          | 2.4217(12) | N1-C2 | 1.504(9) |

|                      |            |         |           |
|----------------------|------------|---------|-----------|
| Mn1-Cl2 <sup>1</sup> | 2.4217(12) | N1-C1   | 1.483(6)  |
| Mn1-Cl1 <sup>1</sup> | 2.3989(12) | N1-C3   | 1.530(12) |
| Mn1-Cl1              | 2.3989(12) | N1-C4   | 1.532(15) |
| Mn1-Br2              | 2.4217(12) | N4-C15  | 1.500(8)  |
| Mn1-Br1              | 2.3989(12) | N4-C21  | 1.505(8)  |
| Br7-C13              | 1.899(7)   | N4-C19  | 1.504(8)  |
| Mn2-Cl4              | 2.4674(13) | N4-C17  | 1.506(8)  |
| Mn2-Cl3              | 2.4242(12) | C5-C6   | 1.495(9)  |
| Mn2-Cl5              | 2.4305(13) | C11-C12 | 1.483(9)  |
| Mn2-Cl6              | 2.4259(14) | C6-C7   | 1.487(9)  |
| Mn2-Br5              | 2.4305(13) | C12-C13 | 1.522(9)  |
| Mn2-Br3              | 2.4242(12) | C21-C23 | 1.545(8)  |
| Mn2-Br4              | 2.4674(13) | C23-C24 | 1.546(8)  |
| Mn2-Br6              | 2.4259(14) | C14-N3  | 1.496(8)  |
| Br9-C7               | 1.902(7)   | Br8-C25 | 1.751(9)  |
| Br10-C24             | 1.818(8)   | C25-C22 | 1.579(11) |
| N2-C9                | 1.491(7)   | C22-C20 | 1.539(9)  |
| N2-C8                | 1.486(7)   | C20-N3  | 1.535(9)  |
| N2-C11               | 1.533(8)   | N3-C18  | 1.504(8)  |
| N2-C10               | 1.504(8)   | N3-C16  | 1.520(9)  |
| N1-C5                | 1.508(8)   |         |           |

<sup>1</sup>1-X, +Y, 3/2-Z

**Table S6** The main bond angles (°) of the crystal structure of [(BTA)<sub>2</sub>MnCl<sub>2.4</sub>Br<sub>1.6</sub>] at 375 K

| Bond angles [°]                        |           |            |           |
|----------------------------------------|-----------|------------|-----------|
| Cl2-Mn1-Cl2 <sup>1</sup>               | 107.39(7) | C2-N1-C4   | 92.0(17)  |
| Cl1-Mn1-Cl2                            | 109.49(4) | C1-N1-C5   | 107.2(5)  |
| Cl1 <sup>1</sup> -Mn1-Cl2 <sup>1</sup> | 109.49(4) | C1-N1-C2   | 107.4(5)  |
| Cl1-Mn1-Cl2 <sup>1</sup>               | 103.45(4) | C1-N1-C3   | 102.9(10) |
| Cl1 <sup>1</sup> -Mn1-Cl2              | 103.45(4) | C1-N1-C4   | 118.5(13) |
| Cl1 <sup>1</sup> -Mn1-Cl1              | 122.87(8) | C15-N4-C21 | 115(3)    |
| Br1-Mn1-Br2                            | 109.49(4) | C15-N4-C19 | 89(3)     |
| Cl3-Mn2-Cl4                            | 106.08(5) | C15-N4-C17 | 115.3(15) |



|             |           |              |           |
|-------------|-----------|--------------|-----------|
| Cl3-Mn2-Cl5 | 116.20(5) | C21-N4-C17   | 111.5(14) |
| Cl3-Mn2-Cl6 | 110.07(5) | C19-N4-C21   | 110.4(14) |
| Cl5-Mn2-Cl4 | 107.20(5) | C19-N4-C17   | 114.0(15) |
| Cl6-Mn2-Cl4 | 107.45(5) | C6-C5-N1     | 116.0(5)  |
| Cl6-Mn2-Cl5 | 109.42(5) | C12-C11-N2   | 114.7(5)  |
| Br5-Mn2-Br4 | 107.20(5) | C7-C6-C5     | 109.5(6)  |
| Br3-Mn2-Br5 | 116.20(5) | C11-C12-C13  | 111.7(6)  |
| Br3-Mn2-Br4 | 106.08(5) | C12-C13-Br7  | 114.6(5)  |
| Br3-Mn2-Br6 | 110.07(5) | C6-C7-Br9    | 113.0(5)  |
| Br6-Mn2-Br5 | 109.42(5) | N4-C21-C23   | 118(3)    |
| Br6-Mn2-Br4 | 107.45(5) | C21-C23-C24  | 107(4)    |
| C9-N2-C11   | 111.4(5)  | C23-C24-Br10 | 106(3)    |
| C9-N2-C10   | 107.6(5)  | C22-C25-Br8  | 118.7(8)  |
| C8-N2-C9    | 109.7(5)  | C20-C22-C25  | 106.2(8)  |
| C8-N2-C11   | 114.2(5)  | N3-C20-C22   | 110.2(7)  |
| C8-N2-C10   | 108.0(5)  | C14-N3-C20   | 110.7(7)  |
| C10-N2-C11  | 105.6(5)  | C14-N3-C18   | 112.8(7)  |
| C5-N1-C3    | 106.5(9)  | C14-N3-C16   | 108.0(7)  |
| C5-N1-C4    | 119.6(12) | C18-N3-C20   | 112.1(7)  |
| C2-N1-C5    | 110.4(5)  | C18-N3-C16   | 106.5(7)  |
| C2-N1-C3    | 121.5(12) | C16-N3-C20   | 106.3(7)  |

<sup>1</sup>1-X, +Y, 3/2-Z

**Table S7** The main bond length (Å) of the crystal structure of [(BTA)<sub>2</sub>MnCl<sub>4</sub>] at 284 K

| Bond lengths [Å]     |            |         |          |
|----------------------|------------|---------|----------|
| Br1-C6               | 1.946(4)   | N3-C16  | 1.510(5) |
| Br2-C12              | 1.943(4)   | N3-C15  | 1.490(5) |
| Mn1-Cl2              | 2.3610(10) | N3-C13  | 1.493(5) |
| Mn1-Cl2 <sup>1</sup> | 2.3611(10) | N3-C14  | 1.498(5) |
| Mn1-Cl1 <sup>1</sup> | 2.3825(11) | N2-C10  | 1.505(5) |
| Mn1-Cl1              | 2.3825(11) | N2-C8   | 1.496(5) |
| Mn2-Cl6              | 2.3857(11) | N2-C7   | 1.493(5) |
| Mn2-Cl4              | 2.3781(11) | N2-C9   | 1.485(5) |
| Mn2-Cl3              | 2.3541(11) | C4-C5   | 1.512(5) |
| Mn2-Cl5              | 2.3560(12) | C10-C11 | 1.509(6) |
| Br3-C18              | 1.933(5)   | C16-C17 | 1.512(6) |
| N1-C4                | 1.519(5)   | C11-C12 | 1.501(5) |
| N1-C1                | 1.490(5)   | C6-C5   | 1.507(5) |
| N1-C2                | 1.497(5)   | C17-C18 | 1.516(6) |
| N1-C3                | 1.493(5)   |         |          |

<sup>2</sup>2-X, +Y, 1/2-Z

**Table S8** The main bond angles (°) of the crystal structure of [(BTA)<sub>2</sub>MnCl<sub>4</sub>] at 284 K

| Bond angles [°]           |           |             |          |
|---------------------------|-----------|-------------|----------|
| Cl2-Mn1-Cl2 <sup>1</sup>  | 124.19(6) | C15-N3-C14  | 108.0(3) |
| Cl2-Mn1-Cl1               | 103.42(4) | C13-N3-C16  | 111.0(3) |
| Cl21-Mn1-Cl1 <sup>1</sup> | 103.42(4) | C13-N3-C14  | 109.1(3) |
| Cl21-Mn1-Cl1              | 109.21(4) | C14-N3-C16  | 107.9(3) |
| Cl2-Mn1-Cl1 <sup>1</sup>  | 109.21(4) | C8-N2-C10   | 107.6(3) |
| Cl11-Mn1-Cl1              | 106.34(6) | C7-N2-C10   | 110.8(3) |
| Cl4-Mn2-Cl6               | 105.94(4) | C7-N2-C8    | 108.1(3) |
| Cl3-Mn2-Cl6               | 107.32(4) | C9-N2-C10   | 111.1(3) |
| Cl3-Mn2-Cl4               | 110.45(4) | C9-N2-C8    | 108.7(4) |
| Cl3-Mn2-Cl5               | 115.80(5) | C9-N2-C7    | 110.3(4) |
| Cl5-Mn2-Cl6               | 106.01(5) | C5-C4-N1    | 114.6(3) |
| Cl5-Mn2-Cl4               | 110.70(5) | N2-C10-C11  | 115.6(3) |
| C1-N1-C4                  | 111.1(3)  | N3-C16-C17  | 114.3(3) |
| C1-N1-C2                  | 109.2(3)  | C12-C11-C10 | 107.8(3) |
| C1-N1-C3                  | 109.5(3)  | C11-C12-Br2 | 112.3(3) |
| C2-N1-C4                  | 106.9(3)  | C5-C6-Br1   | 112.9(3) |
| C3-N1-C4                  | 111.8(3)  | C6-C5-C4    | 111.9(3) |
| C3-N1-C2                  | 108.4(3)  | C16-C17-C18 | 112.0(4) |
| C15-N3-C16                | 111.2(3)  | C17-C18-Br3 | 112.2(3) |
| C15-N3-C13                | 109.5(3)  |             |          |

<sup>1</sup>2-X, +Y, 1/2-Z**Table S9** The main bond length (Å) of the crystal structure of [(BTA)<sub>2</sub>MnCl<sub>4</sub>] at 375 K

| Bond lengths [Å]     |           |        |           |
|----------------------|-----------|--------|-----------|
| Mn1-Cl1 <sup>1</sup> | 2.366(3)  | N1-C2  | 1.469(9)  |
| Mn1-Cl1              | 2.366(3)  | N1-C7  | 1.529(8)  |
| Mn1-Cl2 <sup>1</sup> | 2.348(9)  | N1-C4  | 1.630(16) |
| Mn1-Cl2              | 2.348(9)  | C7-C8  | 1.561(8)  |
| Mn1-Cl3              | 2.356(12) | C6-C5  | 1.646(16) |
| Mn1-Cl3 <sup>1</sup> | 2.356(12) | C8-C9  | 1.641(17) |
| Br2-C6               | 1.852(8)  | C5-C4  | 1.625(16) |
| N1-C1                | 1.467(9)  | Br1-C9 | 1.643(17) |
| N1-C3                | 1.475(9)  |        |           |

<sup>1</sup>1-X, +Y, 3/2-Z

**Table S10** The main bond angles (°) of the crystal structure of [(BTA)<sub>2</sub>MnCl<sub>4</sub>] at 375 K

| Bond angles [°]                        |           |           |           |
|----------------------------------------|-----------|-----------|-----------|
| Cl1-Mn1-Cl1 <sup>1</sup>               | 107.5(2)  | C1-N1-C4  | 87.3(15)  |
| Cl2 <sup>1</sup> -Mn1-Cl1              | 106.4(6)  | C3-N1-C7  | 92.9(11)  |
| Cl2-Mn1-Cl1                            | 106.3(9)  | C3-N1-C4  | 132.5(17) |
| Cl2-Mn1-Cl3 <sup>1</sup>               | 113.5(19) | C2-N1-C3  | 109.5(11) |
| Cl2 <sup>1</sup> -Mn1-Cl3 <sup>1</sup> | 11.3(10)  | C2-N1-C7  | 115.8(12) |
| Cl3-Mn1-Cl1 <sup>1</sup>               | 106.3(7)  | C2-N1-C4  | 106.2(18) |
| Cl3 <sup>1</sup> -Mn1-Cl1              | 106.3(7)  | N1-C7-C8  | 108.6(14) |
| Cl3-Mn1-Cl1                            | 116.4(14) | C5-C6-Br2 | 84.5(13)  |
| Cl3 <sup>1</sup> -Mn1-Cl1 <sup>1</sup> | 116.4(14) | C7-C8-C9  | 119(5)    |
| Cl3-Mn1-Cl3 <sup>1</sup>               | 104(2)    | C4-C5-C6  | 96.9(18)  |
| C1-N1-C3                               | 107.9(11) | C5-C4-N1  | 102.1(18) |
| C1-N1-C2                               | 110.5(11) | C8-C9-Br1 | 129(3)    |
| C1-N1-C7                               | 118.3(14) |           |           |

<sup>1</sup>1-X, +Y, 3/2-Z
